## Expression of Concern

# Expression of Concern: The protective effect of PPAR $\gamma$ in sepsis-induced acute lung injury via inhibiting PTEN/ $\beta$ -catenin pathway

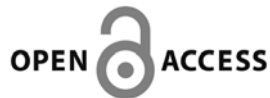

The Editorial Office has been made aware of potential issues surrounding the scientific validity of this paper, hence has issued an expression of concern to notify readers whilst the Editorial Office investigates.

Downloaded from [http://port.silverchair.com/bioscierep/article-pdf/40/6/BSR-20192639\\_EOC/885894/bsr-2019-2639-eoc.pdf](http://port.silverchair.com/bioscierep/article-pdf/40/6/BSR-20192639_EOC/885894/bsr-2019-2639-eoc.pdf) by guest on 10 April 2024

Version of Record published:  
24 June 2020
